# Supplementary material
Source: Elsevier journal article supplement (https://www.sciencedirect.com/science/article/pii/S0300893224004755)
Supplement: mmc1 [file mmc1.pdf]

# Supplementary data

| <b>Table of Contents</b>                                                                                                                            | <b>Page</b> |
|-----------------------------------------------------------------------------------------------------------------------------------------------------|-------------|
| <b>Investigators and collaborators</b>                                                                                                              | 2           |
| List of investigators                                                                                                                               | 2           |
| Executive Committee                                                                                                                                 | 4           |
| Clinical Event Adjudication Committee                                                                                                               | 4           |
| Data Safety Monitoring Board                                                                                                                        | 4           |
| Data coordination and management                                                                                                                    | 4           |
| Angiography core laboratory                                                                                                                         | 5           |
| Intravascular imaging core laboratory                                                                                                               | 5           |
| <b>Supplementary methods</b>                                                                                                                        |             |
| Inclusion and exclusion criteria                                                                                                                    | 6           |
| Primary and secondary endpoints                                                                                                                     | 7           |
| Supplementary statistical analysis                                                                                                                  | 8           |
| Definition of clinical events                                                                                                                       | 10          |
| Protocol of intravascular imaging device use and angiography-guided PCI                                                                             | 15          |
| <b>Supplementary tables</b>                                                                                                                         |             |
| Supplementary table 1. Baseline characteristics of patients according to TIMI risk score for secondary prevention                                   | 19          |
| Supplementary table 2. Baseline angiographic and procedural characteristics of patients according to TIMI risk score for secondary prevention       | 21          |
| Supplementary table 3. Lesion-level analysis of intravascular imaging according to TIMI risk score for secondary prevention                         | 23          |
| Supplementary table 4. Lesion-level analysis of imaging-guided PCI and angiography-guided PCI according to TIMI risk score for secondary prevention | 25          |
| Supplementary table 5. Clinical endpoint of patients with low and high ischemic risk                                                                | 27          |
| <b>References</b>                                                                                                                                   | 28          |

## Investigators and collaborators

### List of investigators

|                        | Name                        | Center                                                                                                                                                                                                                | No. of patients enrolled |
|------------------------|-----------------------------|-----------------------------------------------------------------------------------------------------------------------------------------------------------------------------------------------------------------------|--------------------------|
| Principal investigator | Joo-Yong Hahn, MD, PhD      | Samsung Medical Center, Sungkyunkwan University School of Medicine, Seoul, Korea                                                                                                                                      | 991                      |
| Trial management       | Joo Myung Lee, MD, MPH, PhD |                                                                                                                                                                                                                       |                          |
| Coinvestigators        | Joo Myung Lee, MD, MPH, PhD |                                                                                                                                                                                                                       |                          |
|                        | Ki-Hong Choi, MD, PhD       |                                                                                                                                                                                                                       |                          |
|                        | David Hong, MD              |                                                                                                                                                                                                                       |                          |
|                        | Taek-Kyu Park, MD, PhD      |                                                                                                                                                                                                                       |                          |
|                        | Jeong Hoon Yang, MD, PhD    |                                                                                                                                                                                                                       |                          |
|                        | Young Bin Song, MD, PhD     |                                                                                                                                                                                                                       |                          |
|                        | Seung-Hyuk Choi, MD, PhD    |                                                                                                                                                                                                                       |                          |
|                        | Hyeon-Cheol Gwon, MD, PhD   |                                                                                                                                                                                                                       |                          |
|                        | Jong-Young Lee, MD, PhD     | Kangbuk Samsung Medical Center, Sungkyunkwan University School of Medicine, Seoul, Korea                                                                                                                              | 144                      |
|                        | Seung-Jae Lee, MD, PhD      |                                                                                                                                                                                                                       |                          |
|                        | Sang Yeub Lee, MD, PhD      | Chungbuk National University Hospital, Chungbuk National University College of Medicine, Cheongju, Korea, and Chung-Ang University College of Medicine, Chung-Ang University Gwangmyeong Hospital, Gwangmyeong, Korea | 138                      |
|                        | Sang Min Kim, MD, PhD       | Chungbuk National University Hospital, Chungbuk National University College of Medicine, Cheongju, Korea                                                                                                              |                          |
|                        | Kyeong Ho Yun, MD, PhD      | Wonkwang University Hospital, Iksan, Korea                                                                                                                                                                            | 135                      |
|                        | Jae Young Cho, MD, PhD      |                                                                                                                                                                                                                       |                          |
|                        | Chan Joon Kim, MD, PhD      | The Catholic University of Korea, Uijeongbu St. Mary's Hospital, Seoul, Korea                                                                                                                                         | 51                       |
|                        | Hyo-Suk Ahn, MD, PhD        |                                                                                                                                                                                                                       |                          |
|                        | Chang-Wook Nam, MD, PhD     | Keimyung University Dongsan Hospital, Daegu, Korea                                                                                                                                                                    | 40                       |
|                        | Hyuck-Jun Yoon, MD, PhD     |                                                                                                                                                                                                                       |                          |
|                        | Yong Hwan Park, MD, PhD     | Samsung Changwon Hospital, Sungkyunkwan University School of Medicine, Changwon, Korea                                                                                                                                | 40                       |
|                        | Wang Soo Lee, MD, PhD       | Chung-Ang University College                                                                                                                                                                                          | 28                       |

|  |                          |                                                                                                          |    |
|--|--------------------------|----------------------------------------------------------------------------------------------------------|----|
|  |                          | of Medicine, Chung-Ang University Hospital, Seoul, Korea                                                 |    |
|  | Jin-Ok Jeong, MD, PhD    | Chungnam National University Hospital, Chungnam National University College of Medicine, Daejeon, Korea  | 12 |
|  | Pil Sang Song, MD, PhD   |                                                                                                          |    |
|  | Joon-Hyung Doh, MD, PhD  | Inje University Ilsan-Paik hospital, Goyang, Korea                                                       | 11 |
|  | Sang-Ho Jo, MD, PhD      | Cardiovascular Center, Hallym University Sacred Heart Hospital, Anyang, Korea                            | 10 |
|  | Chang-Hwan Yoon, MD, PhD | Seoul National University Bundang Hospital, Seongnam-si, Gyeonggi-do, Korea                              | 10 |
|  | Min Gyu Kang, MD, PhD    | Gyeongsang National University School of Medicine, Gyeongsang National University Hospital, Jinju, Korea | 7  |
|  | Jin-Sin Koh, MD, PhD     |                                                                                                          |    |
|  | Kwan Yong Lee, MD, PHD   | The Catholic University of Korea, Incheon St Mary's Hospital, Seoul, Korea                               | 6  |
|  | Young-Hyo Lim, MD, PHD   | Hanyang University Seoul Hospital, College of Medicine, Hanyang University, Seoul, Korea                 | 5  |
|  | Yun-Hyeong Cho, MD, PHD  | Hanyang University Myongji Hospital, Goyang, Korea                                                       | 4  |
|  | Jin-Man Cho, MD, PhD     | Kyung Hee University Hospital at Gangdong, Seoul, Korea                                                  | 3  |
|  | Woo Jin Jang, MD, PhD    | Ewha Womans University College of Medicine, Seoul, Korea                                                 | 3  |
|  | Kook-Jin Chun, MD, PhD   | Pusan National University Yangsan Hospital, Yangsan, Korea                                               | 1  |

### **Executive Committee**

Joo-Yong Hahn, MD, PhD, Samsung Medical Center, Sungkyunkwan University School of Medicine, Seoul, Korea

Young Bin Song, MD, PhD, Samsung Medical Center, Sungkyunkwan University School of Medicine, Seoul, Korea

Jeong Hoon Yang, MD, PhD, Samsung Medical Center, Sungkyunkwan University School of Medicine, Seoul, Korea

Joo Myung Lee, MD, MPH, PhD, Samsung Medical Center, Sungkyunkwan University School of Medicine, Seoul, Korea

### **Clinical Event Adjudication Committee**

Hyun-Jong Lee, MD, PhD, Sejong General Hospital, Bucheon, Korea

Dong Ryeol Ryu, MD, PhD, Kangwon National University Hospital, Kangwon National University School of Medicine, Chuncheon, Korea

Kyu Tae Park MD, PhD, Chuncheon Sacred Heart Hospital, Hallym University College of Medicine, Chuncheon, Korea

### **Data Safety Monitoring Board**

Kiyuk Chang, MD, PhD, Seoul St. Mary's Hospital, The Catholic University of Korea, Seoul, Korea

Seonwoo Kim, PhD, Academic Research Service Headquarter, LSK Global PS, Seoul, Korea

Dong-Yeon Kim, MD, PhD, Seoul Medical Center, Seoul, Korea

### **Data coordination and management**

Suyoun Shin, RN, Heart Vascular Stroke Institute, Samsung Medical Center, Sungkyunkwan University School of Medicine, Seoul, Korea

Jinshil Kim, RN, Heart Vascular Stroke Institute, Samsung Medical Center, Sungkyunkwan University School of Medicine, Seoul, Korea

Jaeyoung Park, RN, Heart Vascular Stroke Institute, Samsung Medical Center, Sungkyunkwan University School of Medicine, Seoul, Korea

Seunghyun Lee, RN, Heart Vascular Stroke Institute, Samsung Medical Center, Sungkyunkwan University School of Medicine, Seoul, Korea

Euna Kim, RN, Heart Vascular Stroke Institute, Samsung Medical Center, Sungkyunkwan

University School of Medicine, Seoul, Korea

Hyein Kang, RT, Heart Vascular Stroke Institute, Samsung Medical Center, Sungkyunkwan University School of Medicine, Seoul, Korea

Su Jin Hwang, Heart Vascular Stroke Institute, Samsung Medical Center, Sungkyunkwan University School of Medicine, Seoul, Korea

Yeonhui Lee, Heart Vascular Stroke Institute, Samsung Medical Center, Sungkyunkwan University School of Medicine, Seoul, Korea

### **Angiography core laboratory**

Hyein Kang, RT, Heart Vascular Stroke Institute, Samsung Medical Center, Sungkyunkwan University School of Medicine, Seoul, Korea

Hyun Sung Joh, MD, Seoul National University Boramae Medical Center, Seoul National University College of Medicine, Seoul, Korea

Ki-Hong Choi, MD, PhD, Samsung Medical Center, Sungkyunkwan University School of Medicine, Seoul, Korea

### **Intravascular imaging core laboratory**

Joo Myung Lee, MD, MPH, PhD, Samsung Medical Center, Sungkyunkwan University School of Medicine, Seoul, Korea

Hyein Kang, RT, Heart Vascular Stroke Institute, Samsung Medical Center, Sungkyunkwan University School of Medicine, Seoul, Korea

Se Young Im, RT, Heart Vascular Stroke Institute, Samsung Medical Center, Sungkyunkwan University School of Medicine, Seoul, Korea

## **Supplementary methods**

### **Inclusion and exclusion criteria**

#### **Inclusion criteria**

- ① Subject must be at least 19 years of age
- ② Coronary artery disease requiring percutaneous coronary intervention (PCI)
- ③ Patients with a complex lesion defined as:
  - 1) True bifurcation lesion (Medina 1,1,1/1,0,1/0,1,1) with side branch  $\geq 2.5$  mm
  - 2) Chronic total occlusion ( $\geq 3$  months) as target lesion
  - 3) Unprotected left main (LM) disease PCI (LM ostium, body, distal LM bifurcation, including nontrue bifurcation)
  - 4) Long coronary lesions (implanted stent  $\geq 38$  mm in length)
  - 5) Multivessel PCI ( $\geq 2$  vessels treated at 1 PCI session)
  - 6) Multiple stents needed ( $\geq 3$  stents per patient)
  - 7) In-stent restenosis lesion as target lesion
  - 8) Severely calcified lesion (encircling calcium in angiography)
  - 9) Ostial coronary lesion (left anterior descending artery, left circumflex artery, right coronary artery)
- ④ Subject is able to verbally confirm understandings of risks, benefits and treatment alternatives of receiving invasive evaluation and PCI and he/she or his/her legally authorized representative provides written informed consent prior to any study-related procedure

#### **Exclusion criteria**

- ① Target lesions not amenable to PCI based on operators' review
- ② Cardiogenic shock (Killip class IV) at presentation
- ③ Intolerance to aspirin, clopidogrel, prasugrel, ticagrelor, heparin, or everolimus
- ④ Known true anaphylaxis to contrast medium (not allergic reaction but anaphylactic shock)
- ⑤ Pregnancy or breast feeding
- ⑥ Noncardiac comorbid conditions are present with life expectancy  $< 1$  year or that may result in protocol noncompliance (per site investigator's medical judgment)
- ⑦ Unwillingness or inability to comply with the procedures described in this protocol

## Primary and secondary endpoints

| Primary endpoint                                    |                                                                                                       |
|-----------------------------------------------------|-------------------------------------------------------------------------------------------------------|
| Target vessel failure                               | A composite of cardiac death, target vessel MI, and clinically-driven target vessel revascularization |
| Secondary endpoints                                 |                                                                                                       |
| Target vessel failure without procedure-related MI  |                                                                                                       |
| Cardiac death or target vessel MI                   |                                                                                                       |
| All-cause death                                     |                                                                                                       |
| Cardiac death                                       |                                                                                                       |
| Target vessel MI with procedure-related MI          |                                                                                                       |
| Target vessel MI without procedure-related MI       |                                                                                                       |
| Any MI with procedure-related MI                    |                                                                                                       |
| Any MI without procedure-related MI                 |                                                                                                       |
| Nontarget vessel related MI                         |                                                                                                       |
| Target lesion revascularization                     |                                                                                                       |
| Target vessel revascularization                     |                                                                                                       |
| Any revascularization (clinically-driven)           |                                                                                                       |
| Stent thrombosis                                    |                                                                                                       |
| Incidence of contrast-induced nephropathy           |                                                                                                       |
| Total amount of contrast use                        |                                                                                                       |
| Total procedural time                               |                                                                                                       |
| Total medical cost—not reported in this publication |                                                                                                       |

MI, myocardial infarction.

## Supplementary statistical analysis

**Hypothesis:** An intravascular imaging-guided PCI strategy for patients with complex coronary artery lesions would reduce target vessel failure (a composite of cardiac death, target vessel myocardial infarction, and target vessel revascularization) compared with an angiography-guided PCI strategy.

**Null hypothesis:** An intravascular imaging-guided PCI strategy for patients with complex coronary artery lesions would not reduce target vessel failure (a composite of cardiac death, target vessel myocardial infarction, and target vessel revascularization) compared with an angiography-guided PCI strategy.

## Reported event rates in previous studies of complex PCI

| Study                         | Sample size | Time point | MACE                             |                        |                            |
|-------------------------------|-------------|------------|----------------------------------|------------------------|----------------------------|
|                               |             |            | Intravascular imaging-guided PCI | Angiography-guided PCI | Relative risk reduction, % |
| ADAPT-DES <sup>1</sup>        | 8665        | 1 y        | 3.1%                             | 4.7%                   | 34.0%                      |
| AVIO trial <sup>2</sup>       | 284         | 2 y        | 16.9%                            | 23.2%                  | 27.2%                      |
| HOME DES<br>IVUS <sup>3</sup> | 210         | 1.6 y      | 11.0%                            | 12.0%                  | 8.3%                       |
| RESET <sup>4</sup>            | 543         | 1 y        | 4.5%                             | 7.3%                   | 38.4%                      |
| CTO-IVUS <sup>5</sup>         | 402         | 1 y        | 2.6%                             | 7.1%                   | 63.4%                      |
| IVUS-XPL <sup>6</sup>         | 1400        | 1 y        | 2.9%                             | 5.8%                   | 50.0%                      |

The current trial was designed as a superiority trial to follow enrolled patients until a prespecified follow-up duration of the last patient enrolled. Since the follow-up duration of the previous studies varied, we assumed that the annual incidence of target vessel failure in the angiography-guided PCI group would be 6.0%, based on the results of the CTO-IVUS, RESET, and IVUS-XPL trials. These 3 studies were selected because they were randomized trials conducted in South Korea and the follow-up duration was 1 year. As presented in the above table, the relative risk reduction of target vessel failure of the 3 studies ranged from 38.4% to 63.4%. To be conservative, we assumed that the relative risk reduction at 1 year would be 40% and, in turn, the annual incidence of target vessel failure in the intravascular imaging-guided PCI group would be 3.6%.

## Sample size calculation

- Primary endpoint: Time to occurrence of target vessel failure (a composite of cardiac death, target vessel myocardial infarction, and target vessel revascularization)
- Assumed annual event rate of target vessel failure:
  - Intravascular imaging-guided PCI group (3.6%) vs angiography-guided PCI group (6%)
- Alpha = 0.05 (2-sided),  $\beta$  = 10%, power (1 -  $\beta$ ) = 90%
- Accrual time: 3 years
- Total follow-up time: 1 year after last patient enrollment (median 2.5 years)



- 2:1 randomization
- Primary statistical method: Kaplan-Meier survival analysis with log-rank test
- Assumed dropout: total 5.0%

Based on the above assumptions, a total of 1620 patients (1080 and 540 patients for the intravascular imaging-guided group and the angiography-guided group, respectively) would be needed to evaluate the primary hypothesis with consideration of dropouts.

### **Consideration of 2:1 randomization**

Although previous randomized controlled trials were potentially limited by enrolling a small number of patients, limited follow-up duration, or enrolling patients with highly selected coronary artery lesion subsets, they consistently showed the potential benefit of intravascular imaging-guided PCI compared with angiography-guided PCI.<sup>2,3,5,7,8</sup> In this regard, the executive committee members tried to maximize the potential benefit of intravascular imaging-guided PCI in the treatment of complex coronary artery lesions. While we did not collect the exact proportion of PCI cases done with intravascular imaging guidance from all the participating centers, the adoption rate of intravascular imaging-guided PCI in Korea is about 27.5% to 28.6% according to the Korean Percutaneous Coronary Intervention (K-PCI) Registry, which includes 92 participating centers.<sup>9</sup> Considering the adoption rate of intravascular imaging-guided PCI in Korea, a 2:1 randomization ratio should not introduce bias when interpreting the trial results.

## Definition of clinical events

### Death

Death, as defined by the Academic Research Consortium, is as follows:<sup>10</sup>

All death was considered to be cardiac death unless an unequivocal noncardiac cause could be established. Specifically, any unexpected death, even in patients with coexisting potentially fatal noncardiac disease (eg, cancer, infection), was classified as cardiac. The cause of death (cardiac vs noncardiac) was adjudicated by an independent clinical events adjudication committee.

Cardiac death: Any death due to a proximate cardiac cause (eg, myocardial infarction, low-output failure, fatal arrhythmia), unwitnessed death and death from unknown cause, and all procedure-related deaths, including those related to concomitant treatment, were classified as cardiac death.

Noncardiac death: Any death not covered by the above definitions, such as death caused by infection, malignancy, sepsis, pulmonary causes, accident, suicide, or trauma.

### Myocardial infarction

The definition of myocardial infarction used in this trial was based on the Third Universal Definition of Myocardial Infarction for spontaneous myocardial infarction,<sup>11</sup> and the definition of Society for Cardiovascular Angiography and Interventions for procedure-related myocardial infarction.<sup>12</sup>

#### Spontaneous myocardial infarction

Myocardial infarction was considered to be present when there was evidence of myocardial necrosis in a clinical setting consistent with acute myocardial ischemia.<sup>11</sup> Under these conditions any one of the following criteria meets the diagnosis for myocardial infarction:

1) Detection of a rise and/or fall of cardiac troponin with at least 1 value above the 99th percentile upper reference limit and with at least 1 of the following:

- Symptoms of ischemia
- New or presumed new significant ST-segment T-wave changes or new left bundle branch block (LBBB)
- Development of pathological Q-waves in the ECG
- Imaging evidence of new loss of viable myocardium or new regional wall motion abnormality
- Identification of an intracoronary thrombus by angiography or autopsy

2) Cardiac death with symptoms suggestive of myocardial ischemia and presumed new ischemic ECG changes or new LBBB, but death occurred before cardiac biomarkers were obtained, or before cardiac biomarker values would be increased.

3) Stent thrombosis associated with myocardial infarction when detected by coronary angiography or autopsy in the setting of myocardial ischemia and with a rise and/or fall of cardiac biomarker values with at least 1 value above the 99th percentile upper reference limit.

#### Procedure-related myocardial infarction

Procedure-related myocardial infarction was defined as follows:<sup>12</sup>

- 1) In patients with normal baseline CK-MB, myocardial infarction was considered to have occurred when the peak CK-MB measured within 48 hours of the procedure rose to at least 10 times the local laboratory upper reference limit; or to at least 5 times the upper reference limit with new pathologic Q-waves in at least 2 contiguous leads or new persistent LBBB; or, in the absence of CK-MB measurements and a normal baseline cardiac troponin (cTn), a cTn (I or T) level measured within 48 hours of the PCI rose to at least 70 times the local laboratory upper reference limit; or at least 35 times the upper reference limit with new pathological Q-waves in at least 2 contiguous leads, or new persistent LBBB
- 2) In patients with an elevated baseline CK-MB (or cTn) in whom the biomarkers were stable or falling, the definition was based on when CK-MB (or cTn) rose by an absolute increment equal to those levels recommended above from the most recent preprocedure level.
- 3) In patients with an elevated baseline CK-MB (or cTn) in whom the biomarker levels were not shown to be stable or falling, the definition was based on when CK-MB (or cTn) rose by an absolute increment equal to those levels recommended above plus new ST-segment elevation or depression plus signs consistent with a clinically relevant MI, such as new onset or worsening heart failure or sustained hypotension.

#### **Revascularization**

A coronary revascularization procedure could be either a PCI or a coronary artery bypass grafting surgery. Revascularization is defined by the Academic Research Consortium<sup>10</sup> as follows:

The revascularized coronary segments were subclassified as:

Target lesion: A target lesion was defined as a lesion revascularized in the index procedure (or during a planned or provisional staged procedure). The LM target lesion extends from the left main stem ostium to the end of the 5 mm proximal segments of the left anterior descending and left circumflex arteries as well as the ramus intermedius if the latter vessel has a vessel diameter of at least 2 mm.

Target vessel: The target vessel was defined as the entire major coronary vessel proximal and distal to the target lesion including upstream and downstream branches and the target lesion itself. The LM and any vessel originating from the LM, or its major branches was, by definition, considered a target vessel for the purposes of this trial.

Target vessel nontarget lesion: The target vessel nontarget lesion was a lesion in the epicardial vessel or branch or graft that contains the target lesion; however, this lesion was outside of the target lesion by at least 5 mm distal or proximal to the target lesion determined by quantitative coronary angiography.

Nontarget vessel: The nontarget vessel was any vessel that did not undergo attempts at revascularization at the index procedure but was subsequently revascularized.

Target lesion revascularization: Target lesion revascularization was defined as any repeat PCI of the target lesion or bypass surgery of the target vessel performed for restenosis or another complication of the target lesion. All target lesion revascularizations were classified prospectively as clinically indicated or not clinically indicated by the investigator prior to repeat angiography. An independent angiographic core laboratory verified that the severity of the percent diameter stenosis met the requirements for clinical indication and overruled cases where investigator reports were not in agreement. The target lesion was defined as the treated segment from 5 mm proximal to the stent to 5 mm distal to the stent.

Target vessel revascularization: Target vessel revascularization was defined as any repeat percutaneous intervention or surgical bypass of any segment of the target vessel. The target vessel was defined as the entire major coronary vessel proximal and distal to the target lesion, which included upstream and downstream branches and the target lesion itself.

Nontarget lesion revascularization: Any revascularization in a lesion other than the target lesion was considered a nontarget lesion revascularization.

Nontarget vessel revascularization: Any revascularization in a vessel other than the target vessel was considered a nontarget vessel revascularization.

All revascularization events were adjudicated as either clinically driven or nonclinically driven. Revascularization was considered clinically driven if the diameter stenosis of the revascularized coronary segment was at least 50% on quantitative coronary angiography and any of the following criteria for ischemia were met:

- A positive functional study corresponding to the area served by the target lesion; or
- Ischemic ECG changes at rest in a distribution consistent with the target vessel; or
- Typical ischemic symptoms related to the target lesion; or
- Positive invasive physiologic test (fractional flow reserve  $\leq 0.80$  or instantaneous wave-free ratio  $\leq 0.89$ ); or
- The presence of stenosis with at least 70% diameter stenosis, even in the absence of other criteria

## Stent thrombosis

Stent thrombosis is defined by the Academic Research Consortium<sup>10</sup> as follows:

1) Timing: *a)* acute, *b)* subacute, *c)* late, and *d)* very late

|                                         |                                                        |
|-----------------------------------------|--------------------------------------------------------|
| Acute stent thrombosis <sup>a</sup>     | 0-24 hours after stent implantation                    |
| Subacute stent thrombosis <sup>a</sup>  | More than 24 hours to 30 days after stent implantation |
| Late stent thrombosis <sup>b</sup>      | More than 30 days to 1 year after stent implantation   |
| Very late stent thrombosis <sup>b</sup> | More than 1 year after stent implantation              |

<sup>a</sup> Acute/subacute can also be replaced by early stent thrombosis. Early stent thrombosis (0-30 days) is currently used to define stent thrombosis occurring from day 0 to day 30 by the international interventional cardiology community.

<sup>b</sup> This definition includes “primary” as well as “secondary” late stent thrombosis; “secondary” late stent thrombosis was defined as stent thrombosis that occurred after a target segment revascularization.

2) Stent thrombosis categories: *a)* definite, *b)* probable, and *c)* possible

**Definite stent thrombosis:** Definite stent thrombosis was considered to have occurred on either angiographic or pathologic confirmation.

Angiographic confirmation of stent thrombosis: The presence of an intracoronary thrombus that originated in the stent or in the segment 5 mm proximal or distal to the stent and the presence of at least 1 of the following criteria within a 48-hour time window:

- Acute onset of ischemic symptoms at rest; or
- New ischemic ECG changes that suggested acute ischemia; or
- Typical rise and fall in cardiac biomarkers (refer to the definition of spontaneous myocardial infarction); or
- Nonocclusive thrombus: intracoronary thrombus was defined as a (spherical, ovoid, or irregular) noncalcified filling defect or lucency surrounded by contrast material (on 3 sides or within a coronary stenosis) observed in multiple projections during coronary angiography, or the persistence of contrast material within the lumen, or a visible embolization of intraluminal material downstream.
- Occlusive thrombus: defined as Thrombolysis in Myocardial Infarction (TIMI) grade 0 flow (no flow of contrast after the thrombotic stenosis) or TIMI grade 1 flow (flow past the thrombotic stenosis not filling the vessel entirely) within the stent or proximal to a stent up to the most adjacent proximal side branch or main branch (if the stent originated from the side branch).

Pathological confirmation of stent thrombosis: Evidence of recent thrombus within the stent

determined at autopsy or via examination of tissue retrieved following thrombectomy.

[2] Probable stent thrombosis: The clinical definition of probable stent thrombosis was considered to have occurred after intracoronary stenting in the following cases:

- Any unexplained death within the first 30 days; or
- Irrespective of the time after the index procedure, any myocardial infarction that was related to documented acute ischemia in the territory of the implanted stent without angiographic confirmation of stent thrombosis and in the absence of any other obvious cause.

[3] Possible stent thrombosis: The clinical definition of possible stent thrombosis was considered to have occurred with any unexplained death from 30 days after intracoronary stenting until the end of trial follow-up.

### **Contrast-induced nephropathy**

Contrast-induced nephropathy was defined as an increase in serum creatinine of at least 0.5 mg/dL or at least 25% from baseline within 48 to 72 hours after exposure to a contrast agent.<sup>10</sup>

## **Protocol for intravascular imaging device use and angiography-guided PCI**

PCI was performed using standard techniques. The drug-eluting stents used were either biodegradable polymer-coated everolimus-eluting stents (Synergy, Boston Scientific Corporation, San Jose, CA, USA) or biocompatible polymer-coated everolimus-eluting stents (Xience, Abbott Vascular, St. Paul, MN, USA). The trial limited stent choice to these drug-eluting stents due to the well-validated efficacy and safety profiles of biodegradable polymer-coated everolimus-eluting stents and biocompatible polymer-coated everolimus-eluting stents,<sup>13</sup> the fact that these 2 stents have the highest market share in Korea, and the availability of these drug-eluting stents in all participating centers.

In patients assigned to intravascular imaging-guided PCI, the choice of intravascular imaging device (IVUS or OCT) was at the operators' discretion. While the use of intravascular imaging was allowed at any step of the PCI procedure (prior to intervention, during PCI, and after stent implantation or angioplasty when performed as a standalone procedure), evaluation after PCI using intravascular imaging was mandated for optimization of the stented segment.

Standard protocols for image acquisition were used with the IVUS (Opticross™, Boston Scientific Corporation, San Jose, CA, USA) or OCT (Dragonfly™, Abbott Vascular, St. Paul, MN, USA) devices. Before advancing the intravascular imaging catheter, intracoronary nitroglycerin (100 to 200 µg) was administered. For IVUS, the transducer was pulled back automatically at a speed of 0.5 mm per second. For OCT, preheated contrast media at 37°C was flushed through the guiding catheter at a rate of 2 to 4 mL per second for approximately 3 to 6 seconds using an injector pump to obtain the OCT images. However, the final choice of pullback speed for the IVUS device and the injection rate and amount of contrast media used during OCT imaging were also left to the operators' discretion. If a staged procedure was performed during the same hospitalization, it was strongly recommended that the operator follow the initially allocated imaging or angiography guidance strategy.

Protocols for selecting the reference segments for the lesion, choosing selecting the appropriate size of the stent, and stent optimization were prespecified based on previous reports in the literature.<sup>14</sup> In brief, proximal and distal reference sites were determined at cross-sections adjacent to the target lesion (at least 5 mm apart) that had the largest lumen and a plaque burden of less than 50% on IVUS. Using OCT, proximal and distal reference sites were also determined at cross-sections adjacent to the target lesion (at least 5 mm apart) that had the most normal appearance and were free of lipid-containing plaque. The criteria used to determine optimal stent expansion were a residual angiographic diameter stenosis (defined by percent diameter stenosis;  $[(\text{mean reference vessel diameter} - \text{minimum lumen diameter}) / \text{mean reference vessel diameter}] \times 100$ ) of less than 10% and a minimum stent area (defined by the lumen area measured by intravascular imaging devices at the site of the narrowest lumen inside the stented segment) greater than 80% of the average reference lumen area or an absolute minimum stent area greater than 5.5 mm<sup>2</sup> on IVUS or 4.5 mm<sup>2</sup> on OCT for a stenosis, except if the lesion was in the left main coronary artery. For a left main stenosis, an absolute minimum stent area greater than 7 mm<sup>2</sup> for the distal left main coronary artery and greater than 8 mm<sup>2</sup> for the proximal left main coronary artery were used as optimization criteria, respectively.<sup>14</sup>

An optimized procedural result in the intravascular imaging-guided PCI group was defined as sufficient stent expansion without major stent malapposition and edge dissection. Specific definitions are provided in the table below.

Major stent malapposition was defined as an acute malapposition with the distance of at least 0.4 mm between the vessel wall and the stent, with a longitudinal length of more than 1 mm. Major edge dissection was defined as a dissection occurring within 5 mm from the edge of the stent, extending to the medial layer with a dissection angle of at least 60° of the circumference of the vessel or at least 3 mm in length of the dissection flap. If any of the above findings were identified by the intravascular imaging devices, additional procedures, including adjunctive postdilatation or additional stent implantation followed by further intravascular imaging, were recommended to optimize the final results.

To avoid perforation, the noncompliant balloon diameter was recommended to be no larger than the nearest reference vessel diameter or up to 0.5 mm larger than the mean reference lumen diameter after PCI, based on findings from intravascular imaging. The maximal inflation pressure of the noncompliant balloon was left to the operator; however, it was recommended that the noncompliant balloon be inflated to a pressure above the nominal rated pressure for the balloon. If a major edge dissection was identified by intravascular imaging, additional stent implantation was recommended; the stent size selected was based on findings from the intravascular imaging study. After additional procedural optimization, the intravascular imaging study should be repeated until the acquisition of the optimized results, as described above. However, operators could decide to consider the procedure finished if they believed that there was a potential risk of complications associated with further procedural optimization interventions.

|                        | <b>IVUS</b>                                                                                                                                                                                                                             | <b>OCT</b>                                                                                                                                                                                                                                                                                                                                                                                 |
|------------------------|-----------------------------------------------------------------------------------------------------------------------------------------------------------------------------------------------------------------------------------------|--------------------------------------------------------------------------------------------------------------------------------------------------------------------------------------------------------------------------------------------------------------------------------------------------------------------------------------------------------------------------------------------|
| <b>Reference sites</b> | Largest size vessel lumen;<br>Plaque burden <50%;<br>At least 5 mm away from the target lesion                                                                                                                                          | Most normal looking segment;<br>No lipid-containing plaque;<br>At least 5 mm away from the target lesion                                                                                                                                                                                                                                                                                   |
| <b>Stent sizing</b>    | Vessel diameter (external elastic membrane) is measured at the proximal and distal reference sites. The averaged value of the proximal and distal reference external elastic membrane diameter is used to determine the stent diameter. | Vessel diameter is measured at the distal reference sites (in cases where $\geq 180^\circ$ of the external elastic membrane can be identified). Stent diameter is determined using the mean external elastic membrane diameter at the distal reference, rounded down to the nearest 0.25 mm. For example, if the mean external elastic membrane reference diameter is measured as 3.15 mm, |



|                                                                             | IVUS                                                                                                                                                                                                                                                                                                                                                                                                                                                                                                                                                                                                     | OCT                                                                                                                                                                                                                                                                                                                                                                                                                                                                                 |
|-----------------------------------------------------------------------------|----------------------------------------------------------------------------------------------------------------------------------------------------------------------------------------------------------------------------------------------------------------------------------------------------------------------------------------------------------------------------------------------------------------------------------------------------------------------------------------------------------------------------------------------------------------------------------------------------------|-------------------------------------------------------------------------------------------------------------------------------------------------------------------------------------------------------------------------------------------------------------------------------------------------------------------------------------------------------------------------------------------------------------------------------------------------------------------------------------|
|                                                                             |                                                                                                                                                                                                                                                                                                                                                                                                                                                                                                                                                                                                          | <p>then a 3.0 mm stent diameter will be selected.</p> <p>OR</p> <p>The lumen diameter is measured at the distal reference sites (in cases where <math>\geq 180^\circ</math> of the external elastic membrane cannot be identified). Stent diameter is determined using the mean lumen diameter at the distal reference, rounded up to the nearest 0.25 mm. For example, if the mean distal reference lumen diameter is 2.55 mm, then a 2.75 mm stent diameter will be selected.</p> |
| <b>Stent length</b>                                                         | By measuring the distance from the distal to the proximal reference site.                                                                                                                                                                                                                                                                                                                                                                                                                                                                                                                                |                                                                                                                                                                                                                                                                                                                                                                                                                                                                                     |
| <b>Stent optimization</b>                                                   |                                                                                                                                                                                                                                                                                                                                                                                                                                                                                                                                                                                                          |                                                                                                                                                                                                                                                                                                                                                                                                                                                                                     |
| <ul style="list-style-type: none"> <li>● <b>Stent expansion</b></li> </ul>  | <p>Visually assess that the residual angiographic diameter stenosis is &lt; 10% “AND”</p> <ul style="list-style-type: none"> <li>● Nonleft main coronary artery lesions: in-stent minimal stent lumen area &gt; 80% of the average reference lumen area “OR” a minimal stent area of &gt;5.5 mm<sup>2</sup> on IVUS and &gt; 4.5 mm<sup>2</sup> on OCT.</li> <li>● Left main coronary artery lesions: minimal stent luminal area of &gt;7 mm<sup>2</sup> for a distal left main coronary artery stenosis and &gt; 8 mm<sup>2</sup> for a proximal left main coronary artery stenosis on IVUS.</li> </ul> |                                                                                                                                                                                                                                                                                                                                                                                                                                                                                     |
| <ul style="list-style-type: none"> <li>● <b>Stent apposition</b></li> </ul> | No major malapposition (defined as an acute malapposition of $\geq 0.4$ mm with longitudinal extension > 1 mm) of the stent over its entire length against the vessel wall.                                                                                                                                                                                                                                                                                                                                                                                                                              |                                                                                                                                                                                                                                                                                                                                                                                                                                                                                     |
| <ul style="list-style-type: none"> <li>● <b>Edge dissection</b></li> </ul>  | No major edge dissection in the proximal or distal reference segments, defined as a location that is 5 mm from the edge of the stent, extends to the medial layer with potential to provoke flow disturbances (defined as $\geq 60^\circ$ of the circumference of the vessel at the site of a dissection or $\geq 3$ mm in length of the dissection flap).                                                                                                                                                                                                                                               |                                                                                                                                                                                                                                                                                                                                                                                                                                                                                     |
| <b>Stent optimization technique</b>                                         | <p><b>If any of above findings are identified, additional procedural intervention, including additional postdilatation of the stent or additional stent implantation is recommended.</b></p> <p>For additional postdilatation of the stent, the diameter of the noncompliant balloon should not be larger than the IVUS or OCT</p>                                                                                                                                                                                                                                                                       |                                                                                                                                                                                                                                                                                                                                                                                                                                                                                     |

|  | <b>IVUS</b>                                                                                                                                                                                                                                                                                                                                 | <b>OCT</b> |
|--|---------------------------------------------------------------------------------------------------------------------------------------------------------------------------------------------------------------------------------------------------------------------------------------------------------------------------------------------|------------|
|  | determined mean reference external elastic membrane diameter assessed after stenting of 1 or both segments (proximal or distal), or if the external elastic membrane cannot be measured, no more than 0.5 mm larger than the mean reference segment lumen diameter of 1 or both segments (proximal or distal) nearest to the dilation site. |            |

Among patients assigned to the angiography-guided PCI group, stent optimization was assessed and performed based on angiographic findings. A stent was considered optimized if the angiographic residual diameter stenosis was less than 10% by visual estimation and there was no flow-limiting dissection (type C through F dissection). When underexpansion of the stent was suspected based on angiography, adjunctive balloon dilatation using noncompliant balloons was recommended. To avoid perforation, the noncompliant balloon diameter was recommended to be no larger than the nearest reference vessel diameter, or up to 0.5 mm larger than the mean reference lumen diameter after PCI. The maximal inflation pressure of the noncompliant balloon was left to the operator's discretion; however, it was recommended that the noncompliant balloon inflation pressure be at least above the nominal rated pressure of the balloon. Additional procedural optimization was recommended until the optimized results (as described above) were obtained. Operators could decide to consider the procedure finished if they believed that there was a potential risk of complications associated with additional procedural optimization interventions.

After the index PCI procedure, dual antiplatelet therapy was recommended for at least 3 to 6 months in patients with stable ischemic heart disease and 6 to 12 months in those with acute coronary syndrome, regardless of allocated arms.<sup>15,16</sup> However, the loading, maintenance dose, and duration of dual antiplatelet therapy were left to the physicians' discretion. Regardless of patient assignment, guideline-directed medical therapy was recommended according to the current American College of Cardiology/ American Heart Association/ Society of Coronary Angiographers and Interventionalists or the European Society of Cardiology/European Association for Cardiothoracic Surgery guidelines.<sup>17,18</sup> All coronary angiograms and intravascular imaging data were analyzed by the independent core laboratories.

## Supplementary Tables

**Supplementary Table 1.** Baseline characteristics of patients according to TIMI risk score for secondary prevention

|                                          | Low-risk by TRS-2P < 3<br>(n = 1247) | High-risk by TRS-2P ≥ 3<br>(n = 392) | P      |
|------------------------------------------|--------------------------------------|--------------------------------------|--------|
| <b>Characteristics</b>                   |                                      |                                      |        |
| <i>Age, y</i>                            | 63.8 ± 9.6                           | 71.2 ± 9.8                           | < .001 |
| <i>Male sex</i>                          | 1009 (80.9)                          | 291 (74.2)                           | .005   |
| <i>Body mass index, kg/m<sup>2</sup></i> | 24.8 ± 3.2                           | 24.7 ± 3.4                           | .547   |
| <i>Initial presentation</i>              |                                      |                                      | .084   |
| Stable ischemic heart disease            | 621 (49.8)                           | 186 (47.4)                           |        |
| Unstable angina                          | 414 (33.2)                           | 120 (30.6)                           |        |
| Acute myocardial infarction              | 212 (17.0)                           | 86 (21.9)                            |        |
| <b>Medical history</b>                   |                                      |                                      |        |
| <i>Hypertension</i>                      | 636 (51.0)                           | 369 (94.1)                           | < .001 |
| <i>Diabetes mellitus</i>                 | 324 (26.0)                           | 293 (74.7)                           | < .001 |
| <i>Dyslipidemia</i>                      | 602 (48.3)                           | 238 (60.7)                           | < .001 |
| <i>Current smoking</i>                   | 185 (14.8)                           | 122 (31.1)                           | < .001 |
| <i>Family history of premature CAD</i>   | 81 (6.5)                             | 17 (4.3)                             | .147   |
| <i>Chronic kidney disease</i>            | 91 (7.3)                             | 205 (52.3)                           | < .001 |
| <i>Previous PCI</i>                      | 266 (21.3)                           | 129 (32.9)                           | < .001 |
| <i>Previous myocardial infarction</i>    | 76 (6.1)                             | 41 (10.5)                            | .005   |
| <i>Previous stroke</i>                   | 40 (3.2)                             | 72 (18.4)                            | < .001 |
| <i>Peripheral artery disease</i>         | 12 (1.0)                             | 32 (8.2)                             | < .001 |
| <i>LV ejection fraction, %</i>           | 59.9 ± 10.7                          | 55.0 ± 13.4                          | < .001 |
| <b>Discharge medication</b>              |                                      |                                      |        |
| <i>Aspirin</i>                           | 1222 (98.0)                          | 384 (98.0)                           | .999   |
| <i>P2Y<sub>12</sub> inhibitor</i>        |                                      |                                      |        |
| Any                                      | 1220 (97.8)                          | 383 (97.7)                           | .999   |
| Clopidogrel                              | 896 (71.9)                           | 320 (81.6)                           | < .001 |
| Ticagrelor                               | 167 (13.4)                           | 42 (10.7)                            | .194   |
| Prasugrel                                | 157 (12.6)                           | 21 (5.4)                             | < .001 |
| <i>Oral anticoagulant</i>                | 52 (4.2)                             | 23 (5.9)                             | .206   |
| <i>Statin</i>                            | 1203 (96.5)                          | 364 (92.9)                           | .004   |

|                             |            |            |        |
|-----------------------------|------------|------------|--------|
| <i>Beta blocker</i>         | 503 (40.3) | 207 (52.8) | < .001 |
| <i>ACE inhibitor or ARB</i> | 679 (54.5) | 266 (67.9) | < .001 |

ACE, angiotensin-converting enzyme; ARB, angiotensin receptor blockers; CAD, coronary artery disease; LV, left ventricular; PCI, percutaneous coronary intervention.

Data are presented as No. (%) or mean  $\pm$  standard deviation.

**Supplementary Table 2.** Baseline angiographic and procedural characteristics of patients according to TIMI risk score for secondary prevention

| Characteristics                               | Low-risk by TRS-2P < 3<br>(n = 1247) | High-risk by TRS-2P ≥ 3<br>(n = 392) | P      |
|-----------------------------------------------|--------------------------------------|--------------------------------------|--------|
| <b>Target lesion characteristics</b>          |                                      |                                      |        |
| <i>Complex coronary lesions</i>               |                                      |                                      |        |
| Chronic total occlusion                       | 245 (19.6)                           | 74 (18.9)                            | .793   |
| True bifurcation                              | 284 (22.8)                           | 75 (19.1)                            | .147   |
| Unprotected left main disease                 | 140 (11.2)                           | 52 (13.3)                            | .315   |
| Long coronary lesion                          | 685 (54.9)                           | 213 (54.3)                           | .882   |
| Multivessel PCI                               | 457 (36.6)                           | 165 (42.1)                           | .060   |
| Multiple stents implanted                     | 229 (18.4)                           | 76 (19.4)                            | .704   |
| In-stent restenosis lesion                    | 152 (12.2)                           | 84 (21.4)                            | < .001 |
| Severely calcified lesion                     | 158 (12.7)                           | 73 (18.6)                            | .004   |
| Ostial coronary lesion                        | 194 (15.6)                           | 57 (14.5)                            | .684   |
| <i>Number of complex coronary lesions ≥ 3</i> | 366 (29.4)                           | 139 (35.5)                           | .026   |
| <i>Arteries with stenosis</i>                 |                                      |                                      | <.001  |
| 1-vessel disease                              | 444 (35.6)                           | 82 (20.9)                            |        |
| 2-vessel disease                              | 457 (36.6)                           | 164 (41.8)                           |        |
| 3-vessel disease                              | 346 (27.7)                           | 146 (37.2)                           |        |
| <b>Procedural characteristics</b>             |                                      |                                      |        |
| <i>Total no. of target lesions treated</i>    | 1.5 ± 0.7                            | 1.5 ± 0.7                            | .294   |
| <i>Radial access</i>                          | 1015 (81.4)                          | 238 (60.7)                           | <.001  |
| <i>Intravascular imaging devices used</i>     | 831 (66.6)                           | 260 (66.3)                           | .957   |
| Intravascular ultrasound                      | 601/831 (72.3)                       | 212/260 (81.5)                       | .004   |
| Optical coherence tomography                  | 230/831 (27.7)                       | 48/260 (18.5)                        | .004   |
| <i>Adjunctive noncompliant balloon used</i>   | 879 (70.5)                           | 255 (65.1)                           | .049   |
| <i>Rotablation used</i>                       | 35 (2.8)                             | 18 (4.6)                             | .114   |
| <i>Treatment devices used</i>                 |                                      |                                      | .185   |
| Drug-eluting stent                            | 1217 (97.6)                          | 377 (96.2)                           |        |
| Drug-coated balloon angioplasty               | 30 (2.4)                             | 15 (3.8)                             |        |
| <i>Total no. of devices used per patient</i>  | 1.9 ± 1.0                            | 2.0 ± 1.1                            | .044   |
| <i>Dimensions of devices, mm</i>              |                                      |                                      |        |
| Total length                                  | 54.9 ± 32.4                          | 57.6 ± 33.0                          | .153   |
| Mean diameter                                 | 3.1 ± 0.4                            | 3.1 ± 0.4                            | .172   |
| <i>Volume of contrast media used, mL</i>      | 213.6 ± 114.6                        | 187.5 ± 120.3                        | <.001  |
| <i>Procedural time, min</i>                   | 73.2 ± 41.1                          | 79.2 ± 50.6                          | .031   |
| <i>Procedural success</i>                     | 1241 (99.5)                          | 387 (98.7)                           | .185   |

PCI, percutaneous coronary intervention.

The data are presented as No. (%) or mean  $\pm$  standard deviation.

**Supplementary Table 3.** Lesion-level analysis of intravascular imaging according to TIMI risk score for secondary prevention

| Characteristics                                       | IVUS-guided PCI (n = 1188) <sup>a</sup> |                        |          | OCT-guided PCI (n = 361) |                       |          |
|-------------------------------------------------------|-----------------------------------------|------------------------|----------|--------------------------|-----------------------|----------|
|                                                       | Low-risk<br>(n = 889)                   | High-risk<br>(n = 299) | <i>P</i> | Low-risk<br>(n = 296)    | High-risk<br>(n = 65) | <i>P</i> |
| <b>Location of target lesion</b>                      |                                         |                        | .087     |                          |                       | .118     |
| <i>Left main artery</i>                               | 111 (12.5)                              | 38 (12.7)              |          | 12 (4.1)                 | 3 (4.6)               |          |
| <i>Left anterior descending artery</i>                | 376 (42.3)                              | 111 (37.1)             |          | 165 (55.7)               | 26 (40.0)             |          |
| <i>Circumflex artery</i>                              | 176 (19.8)                              | 52 (17.4)              |          | 50 (16.9)                | 13 (20.0)             |          |
| <i>Right coronary artery</i>                          | 226 (25.4)                              | 98 (32.8)              |          | 69 (23.3)                | 23 (35.4)             |          |
| <b>Profile of intravascular imaging use</b>           |                                         |                        | .899     |                          |                       | .257     |
| <i>Pre-PCI evaluation only</i>                        | 4 (0.4)                                 | 2 (0.7)                |          | 10 (3.4)                 | 0 (0)                 |          |
| <i>Post-PCI evaluation only</i>                       | 209 (23.5)                              | 70 (23.4)              |          | 73 (24.7)                | 14 (21.5)             |          |
| <i>Both pre- and post-PCI evaluation</i>              | 676 (76.0)                              | 227 (75.9)             |          | 213 (72.0)               | 51 (78.5)             |          |
| <b>Pre-PCI analysis</b>                               |                                         |                        |          |                          |                       |          |
| <i>Proximal reference</i>                             |                                         |                        |          |                          |                       |          |
| External elastic membrane area, mm <sup>2</sup>       | 17.6 ± 5.4                              | 17.5 ± 5.2             | .702     | 14.3 ± 4.5               | 11.3 ± 3.6            | .015     |
| Lumen area, mm <sup>2</sup>                           | 10.6 ± 3.9                              | 9.8 ± 3.5              | .008     | 8.6 ± 3.0                | 7.7 ± 2.8             | .108     |
| Plaque burden, %                                      | 39.6 ± 10.9                             | 43.8 ± 10.8            | <.001    | 38.2 ± 8.8               | 39.4 ± 7.6            | .635     |
| <i>Minimal lumen area, mm<sup>2</sup></i>             | 2.4 ± 0.9                               | 2.3 ± 0.9              | .809     | 1.8 ± 1.2                | 1.7 ± 0.8             | .276     |
| <i>Maximal plaque burden at MLA, mm<sup>2</sup></i>   | 80.6 ± 7.1                              | 81.8 ± 6.6             | .032     | NA                       | NA                    |          |
| <i>Distal reference</i>                               |                                         |                        |          |                          |                       |          |
| External elastic membrane area, mm <sup>2</sup>       | 10.6 ± 4.8                              | 11.2 ± 5.3             | .109     | 8.7 ± 3.6                | 8.0 ± 3.4             | .431     |
| Lumen area, mm <sup>2</sup>                           | 6.9 ± 2.9                               | 6.7 ± 2.8              | .231     | 5.7 ± 2.6                | 5.6 ± 2.3             | .788     |
| Plaque burden, %                                      | 31.9 ± 12.2                             | 37.1 ± 13.7            | <.001    | 35.6 ± 9.9               | 35.0 ± 9.0            | .821     |
| <i>Lesion length, mm</i>                              | 32.9 ± 18.6                             | 34.8 ± 18.8            | .200     | 33.2 ± 13.9              | 30.6 ± 11.7           | .268     |
| <b>Dimensions of devices, mm</b>                      |                                         |                        |          |                          |                       |          |
| <i>Mean diameter</i>                                  | 3.15 ± 0.47                             | 3.07 ± 0.44            | .011     | 3.1 ± 0.4                | 3.2 ± 0.5             | .181     |
| <i>Total length</i>                                   | 38.5 ± 20.3                             | 40.0 ± 19.6            | .281     | 38.0 ± 18.1              | 33.4 ± 15.8           | .061     |
| <b>Post-PCI analysis</b>                              |                                         |                        |          |                          |                       |          |
| <i>Stent expansion, %</i>                             | 71.9 ± 17.3                             | 70.8 ± 16.2            | .328     | 74.8 ± 18.6              | 79.8 ± 18.9           | .068     |
| <i>Minimum stent area, mm<sup>2</sup></i>             | 5.9 ± 2.1                               | 5.5 ± 1.9              | .010     | 5.2 ± 1.9                | 5.4 ± 2.0             | .616     |
| <b>Prespecified optimization criteria<sup>b</sup></b> |                                         |                        |          |                          |                       |          |
| <i>Plaque burden at stent landing zone &lt; 50%</i>   | 829 (93.3)                              | 261 (87.3)             | .002     | NA                       | NA                    | NA       |
| <i>Optimal stent expansion<sup>c</sup></i>            | 551 (62.0)                              | 171 (57.2)             | .162     | 217 (73.3)               | 54 (83.1)             | .136     |
| <i>Edge dissection</i>                                |                                         |                        |          |                          |                       |          |
| Any edge dissection                                   | 27 (3.0)                                | 9 (3.0)                | .999     | 37 (12.5)                | 10 (15.4)             | .673     |
| Major edge dissection <sup>d</sup>                    | 6 (0.7)                                 | 1 (0.3)                | .819     | 8 (2.7)                  | 4 (6.2)               | .306     |

*Stent malapposition*

|                                                       |                   |                   |             |                   |                  |             |
|-------------------------------------------------------|-------------------|-------------------|-------------|-------------------|------------------|-------------|
| Any stent malapposition                               | 37 (4.2)          | 14 (4.7)          | .827        | 54 (18.2)         | 19 (29.2)        | .068        |
| Major stent malapposition <sup>e  </sup>              | 3 (0.3)           | 7 (2.3)           | .004        | 23 (7.8)          | 8 (12.3)         | .348        |
| <i>Optimized results (met all the above criteria)</i> | <i>518 (58.3)</i> | <i>141 (47.2)</i> | <i>.001</i> | <i>193 (65.2)</i> | <i>45 (69.2)</i> | <i>.634</i> |

The data are presented as No. (%) or mean  $\pm$  standard deviation.

<sup>a</sup> Among the total 1623 lesions in the intravascular imaging-guided PCI group, core laboratory analysis could not be performed for 74 lesions due to insufficient lesion coverage, suboptimal image quality, manual pullback of the IVUS catheter, or lack of raw data of intravascular imaging.

<sup>b</sup> Protocols for selecting reference segment, selecting appropriated size of stent, and stent optimization were prespecified and are described in the Supplementary Appendix.

<sup>c</sup> Optimal stent expansion was defined as visually assess residual angiographic diameter stenosis <10% and in-stent minimum stent area (MSA) >80% of the average reference lumen area or absolute MSA >5.5 mm<sup>2</sup> (IVUS) and >4.5 mm<sup>2</sup> (OCT). For left main stenosis, MSA >7 mm<sup>2</sup> for distal left main and >8 mm<sup>2</sup> for proximal left main was used as optimization criteria.

<sup>d</sup> Major edge dissection was defined as 5mm from the edge of the stent, extended to media layer with potential to provoke flow disturbances (defined as  $\geq 60^\circ$  of the circumference of the vessel at site of dissection and/or  $\geq 3$  mm in length of dissection flap).

<sup>e</sup> Major malapposition was defined as an acute malapposition of  $\geq 0.4$  mm with longitudinal extension >1 mm of the stent over its entire length against the vessel wall.



**Supplementary Table 4.** Lesion-level analysis of imaging-guided PCI and angiography-guided PCI according to TIMI risk score for secondary prevention

| Characteristics                                     | Low-risk by TRS-2P < 3 (n = 1841) |                                     |          | High-risk by TRS-2P ≥ 3 (n = 597) |                                     |          |
|-----------------------------------------------------|-----------------------------------|-------------------------------------|----------|-----------------------------------|-------------------------------------|----------|
|                                                     | Imaging-guided PCI<br>(n = 1224)  | Angiography-guided PCI<br>(n = 617) | <i>P</i> | Imaging-guided PCI<br>(n = 399)   | Angiography-guided PCI<br>(n = 198) | <i>P</i> |
| <b>Location of target vessel</b>                    |                                   |                                     | .493     |                                   |                                     | .837     |
| <i>Left main artery</i>                             | 123 (10.0)                        | 51 (8.3)                            |          | 41 (10.3)                         | 22 (11.1)                           |          |
| <i>Left anterior descending artery</i>              | 554 (45.3)                        | 298 (48.3)                          |          | 147 (36.8)                        | 78 (39.4)                           |          |
| <i>Circumflex artery</i>                            | 238 (19.4)                        | 119 (19.3)                          |          | 75 (18.8)                         | 32 (16.2)                           |          |
| <i>Right coronary artery</i>                        | 309 (25.2)                        | 149 (24.1)                          |          | 136 (34.1)                        | 66 (33.3)                           |          |
| <b>Quantitative coronary angiography</b>            |                                   |                                     |          |                                   |                                     |          |
| <i>Pre-PCI QCA</i>                                  |                                   |                                     |          |                                   |                                     |          |
| Proximal reference vessel diameter, mm              | 3.2 ± 0.5                         | 3.1 ± 0.5                           | < .001   | 3.2 ± 0.5                         | 3.1 ± 0.5                           | .599     |
| Distal reference vessel diameter, mm                | 2.8 ± 0.5                         | 2.7 ± 0.4                           | .256     | 2.7 ± 0.5                         | 2.7 ± 0.5                           | .924     |
| Minimum lumen diameter, mm                          | 0.44 ± 0.36                       | 0.45 ± 0.37                         | .730     | 0.42 ± 0.37                       | 0.42 ± 0.36                         | .997     |
| Diameter stenosis, %                                | 85.3 ± 11.5                       | 85.1 ± 11.7                         | .664     | 85.9 ± 11.6                       | 85.8 ± 11.6                         | .920     |
| Lesion length, mm                                   | 28.4 ± 15.8                       | 26.4 ± 14.1                         | .006     | 28.2 ± 16.3                       | 28.1 ± 16.9                         | .945     |
| <i>Post-PCI QCA*</i>                                |                                   |                                     |          |                                   |                                     |          |
| Minimum lumen diameter, mm                          | 2.8 ± 0.5                         | 2.7 ± 0.5                           | .002     | 2.7 ± 0.5                         | 2.7 ± 0.5                           | .684     |
| Diameter stenosis, %                                | 9.5 ± 8.2                         | 9.8 ± 8.7                           | .432     | 10.6 ± 10.9                       | 10.4 ± 8.2                          | .804     |
| Post-PCI residual stenosis<10%                      | 835/1176 (71.0)                   | 415/599 (69.3)                      | .486     | 263/384 (68.5)                    | 125/187 (66.8)                      | .764     |
| <b>Adjunctive noncompliant balloon used</b>         | 756 (61.8)                        | 287 (46.5)                          | < .001   | 224 (56.1)                        | 84 (42.4)                           | .002     |
| <b>Rotablation used</b>                             | 28 (2.3)                          | 9 (1.5)                             | .308     | 14 (3.5)                          | 8 (4.0)                             | .925     |
| <b>Treatment devices used</b>                       |                                   |                                     | .572     |                                   |                                     | .613     |
| <i>Drug-eluting stent</i>                           | 1158 (94.6)                       | 579 (93.8)                          |          | 369 (92.5)                        | 180 (90.9)                          |          |
| <i>Drug-coated balloon angioplasty</i>              | 66 (5.4)                          | 38 (6.2)                            |          | 30 (7.5)                          | 18 (9.1)                            |          |
| <b>Total no. of devices used per treated lesion</b> | 1.3 ± 0.5                         | 1.2 ± 0.5                           | .011     | 1.3 ± 0.5                         | 1.4 ± 0.6                           | .191     |
| <b>Dimensions of devices, mm</b>                    |                                   |                                     |          |                                   |                                     |          |

|                           |             |             |        |             |             |      |
|---------------------------|-------------|-------------|--------|-------------|-------------|------|
| <i>Total length</i>       | 38.1 ± 19.7 | 36.2 ± 17.5 | .039   | 37.6 ± 19.0 | 39.1 ± 21.0 | .355 |
| <i>Mean diameter</i>      | 3.1 ± 0.5   | 3.0 ± 0.4   | < .001 | 3.1 ± 0.5   | 3.0 ± 0.5   | .809 |
| <b>Procedural success</b> | 1208 (98.7) | 612 (99.2)  | .475   | 393 (98.5)  | 194 (98.0)  | .901 |

PCI, percutaneous coronary intervention; QCA, quantitative coronary angiography.

The data are presented as No. (%) or mean ± standard deviation.

\*Quantitative coronary angiography after PCI was not available for 92 lesions in 84 patients.

**Supplementary Table 5.** Clinical endpoints of patients with low and high ischemic risk

| Endpoints                                                    | Low-risk by TRS-2P < 3<br>(n = 1247) | High-risk by TRS-2P ≥ 3 (n<br>= 392) | Hazard ratio (95%CI) | P      |
|--------------------------------------------------------------|--------------------------------------|--------------------------------------|----------------------|--------|
| <b>Primary endpoint</b>                                      |                                      |                                      |                      |        |
| <i>Target vessel failure</i>                                 | 83 (7.2)                             | 53 (15.5)                            | 2.13 (1.51-3.00)     | < .001 |
| <b>Secondary endpoints</b>                                   |                                      |                                      |                      |        |
| <i>Target vessel failure without procedure-related MI</i>    | 52 (4.8)                             | 36 (11.3)                            | 2.31 (1.51-3.53)     | < .001 |
| <i>Cardiac death or target vessel-related MI</i>             | 52 (4.5)                             | 44 (12.5)                            | 2.79 (1.87-4.17)     | < .001 |
| <i>Cardiac death or spontaneous target vessel-related MI</i> | 20 (1.9)                             | 27 (8.3)                             | 4.48 (2.51-7.99)     | < .001 |
| <i>All-cause death</i>                                       | 29 (3.2)                             | 41 (13.3)                            | 4.67 (2.90-7.52)     | < .001 |
| <i>Cardiac death</i>                                         | 12 (1.1)                             | 21 (6.5)                             | 5.76 (2.83-11.71)    | < .001 |
| <i>Myocardial infarction</i>                                 | 44 (3.8)                             | 31 (9.1)                             | 2.31 (1.46-3.66)     | < .001 |
| Target vessel-related MI                                     | 42 (3.5)                             | 26 (6.9)                             | 2.02 (1.24-3.29)     | .005   |
| Spontaneous MI                                               | 9 (0.9)                              | 8 (2.3)                              | 2.98 (1.15-7.73)     | .025   |
| Procedure-related MI                                         | 33 (2.6)                             | 19 (4.8)                             | 1.85 (1.05-3.25)     | .033   |
| Nontarget vessel related MI                                  | 3 (0.3)                              | 5 (2.2)                              | 5.50 (1.31-23.01)    | .020   |
| <i>Repeat revascularization</i>                              | 62 (6.0)                             | 25 (8.7)                             | 1.36 (0.86-2.17)     | .192   |
| Target vessel revascularization                              | 41 (3.8)                             | 16 (5.2)                             | 1.31 (0.74-2.34)     | .359   |
| Target lesion revascularization                              | 31 (2.9)                             | 13 (4.1)                             | 1.41 (0.74-2.69)     | .302   |
| Nontarget vessel revascularization                           | 32 (3.3)                             | 10 (3.8)                             | 1.04 (0.51-2.13)     | .903   |
| <i>Definite stent thrombosis</i>                             | 1 (0.1)                              | 4 (1.1)                              | 13.16 (1.47-117.71)  | .021   |
| <i>Cerebrovascular accident</i>                              | 13 (1.2)                             | 7 (2.3)                              | 1.79 (0.72-4.49)     | .213   |
| <i>Contrast-induced nephropathy</i>                          | 19 (1.5)                             | 21 (5.4)                             | 3.55 (1.91-6.61)     | < .001 |

CI, confidence interval; MI, myocardial infarction; PCI, percutaneous coronary intervention.

Values are expressed as No. (%). Cumulative incidences of events are presented as Kaplan-Meier estimates.

## References

1. Witzenbichler B, Maehara A, Weisz G, Neumann FJ, Rinaldi MJ, Metzger DC, Henry TD, Cox DA, Duffy PL, Brodie BR, et al. Relationship between intravascular ultrasound guidance and clinical outcomes after drug-eluting stents: the assessment of dual antiplatelet therapy with drug-eluting stents (ADAPT-DES) study. *Circulation*. 2014;129:463-470. doi: 10.1161/CIRCULATIONAHA.113.003942.
2. Chieffo A, Latib A, Caussin C, Presbitero P, Galli S, Menozzi A, Varbella F, Mauri F, Valgimigli M, Arampatzis C, et al. A prospective, randomized trial of intravascular-ultrasound guided compared to angiography guided stent implantation in complex coronary lesions: the AVIO trial. *Am Heart J*. 2013;165:65-72. doi: 10.1016/j.ahj.2012.09.017.
3. Jakabcin J, Spacek R, Bystron M, Kvasnak M, Jager J, Veselka J, Kala P, Cervinka P. Long-term health outcome and mortality evaluation after invasive coronary treatment using drug eluting stents with or without the IVUS guidance. Randomized control trial. HOME DES IVUS. *Catheter Cardiovasc Interv*. 2010;75:578-583. doi: 10.1002/ccd.22244.
4. Kim JS, Kang TS, Mintz GS, Park BE, Shin DH, Kim BK, Ko YG, Choi D, Jang Y, Hong MK. Randomized comparison of clinical outcomes between intravascular ultrasound and angiography-guided drug-eluting stent implantation for long coronary artery stenoses. *JACC Cardiovasc Interv*. 2013;6:369-376. doi: 10.1016/j.jcin.2012.11.009.
5. Kim BK, Shin DH, Hong MK, Park HS, Rha SW, Mintz GS, Kim JS, Kim JS, Lee SJ, Kim HY, et al. Clinical Impact of Intravascular Ultrasound-Guided Chronic Total Occlusion Intervention With Zotarolimus-Eluting Versus Biolimus-Eluting Stent Implantation: Randomized Study. *Circ Cardiovasc Interv*. 2015;8:e002592. doi: 10.1161/CIRCINTERVENTIONS.115.002592.
6. Hong SJ, Kim BK, Shin DH, Nam CM, Kim JS, Ko YG, Choi D, Kang TS, Kang WC, Her AY, et al. Effect of Intravascular Ultrasound-Guided vs Angiography-Guided Everolimus-Eluting Stent Implantation: The IVUS-XPL Randomized Clinical Trial. *JAMA*. 2015;314:2155-2163. doi: 10.1001/jama.2015.15454.
7. Hong SJ, Mintz GS, Ahn CM, Kim JS, Kim BK, Ko YG, Kang TS, Kang WC, Kim YH, Hur SH, et al. Effect of Intravascular Ultrasound-Guided Drug-Eluting Stent Implantation: 5-Year Follow-Up of the IVUS-XPL Randomized Trial. *JACC Cardiovasc Interv*. 2020;13:62-71. doi: 10.1016/j.jcin.2019.09.033.
8. Gao XF, Ge Z, Kong XQ, Kan J, Han L, Lu S, Tian NL, Lin S, Lu QH, Wang XY, et al. 3-Year Outcomes of the ULTIMATE Trial Comparing Intravascular Ultrasound Versus Angiography-Guided Drug-Eluting Stent Implantation. *JACC Cardiovasc Interv*. 2021;14:247-257. doi: 10.1016/j.jcin.2020.10.001.
9. Shin DH, Kang HJ, Jang JS, Moon KW, Song YB, Park DW, Bae JW, Kim J, Hur SH, Kim BO, et al. The Current Status of Percutaneous Coronary Intervention in Korea: Based on Year 2014 & 2016 Cohort of Korean Percutaneous Coronary Intervention (K-PCI) Registry. *Korean Circ J*. 2019;49:1136-1151. doi: 10.4070/kcj.2018.0413.
10. Garcia-Garcia HM, McFadden EP, Farb A, Mehran R, Stone GW, Spertus J, Onuma Y, Morel MA, van Es GA, Zuckerman B, et al. Standardized End Point Definitions for Coronary Intervention Trials: The Academic Research Consortium-2 Consensus Document. *Circulation*. 2018;137:2635-2650. doi: 10.1161/CIRCULATIONAHA.117.029289.
11. Thygesen K, Alpert JS, Jaffe AS, Simoons ML, Chaitman BR, White HD, Joint ESCAAHAWHFTFftUDoMI, Katus HA, Lindahl B, Morrow DA, et al. Third universal

- definition of myocardial infarction. *Circulation*. 2012;126:2020-2035. doi: 10.1161/CIR.0b013e31826e1058.
12. Moussa ID, Klein LW, Shah B, Mehran R, Mack MJ, Brilakis ES, Reilly JP, Zoghbi G, Holper E, Stone GW. Consideration of a new definition of clinically relevant myocardial infarction after coronary revascularization: an expert consensus document from the Society for Cardiovascular Angiography and Interventions (SCAI). *J Am Coll Cardiol*. 2013;62:1563-1570. doi: 10.1016/j.jacc.2013.08.720.
  13. Bangalore S, Toklu B, Amoroso N, Fusaro M, Kumar S, Hannan EL, Faxon DP, Feit F. Bare metal stents, durable polymer drug eluting stents, and biodegradable polymer drug eluting stents for coronary artery disease: mixed treatment comparison meta-analysis. *BMJ*. 2013;347:f6625. doi: 10.1136/bmj.f6625.
  14. Raber L, Mintz GS, Koskinas KC, Johnson TW, Holm NR, Onuma Y, Radu MD, Joner M, Yu B, Jia H, et al. Clinical use of intracoronary imaging. Part 1: guidance and optimization of coronary interventions. An expert consensus document of the European Association of Percutaneous Cardiovascular Interventions. *Eur Heart J*. 2018;39:3281-3300. doi: 10.1093/eurheartj/ehy285.
  15. Levine GN, Bates ER, Bittl JA, Brindis RG, Fihn SD, Fleisher LA, Granger CB, Lange RA, Mack MJ, Mauri L, et al. 2016 ACC/AHA Guideline Focused Update on Duration of Dual Antiplatelet Therapy in Patients With Coronary Artery Disease: A Report of the American College of Cardiology/American Heart Association Task Force on Clinical Practice Guidelines: An Update of the 2011 ACCF/AHA/SCAI Guideline for Percutaneous Coronary Intervention, 2011 ACCF/AHA Guideline for Coronary Artery Bypass Graft Surgery, 2012 ACC/AHA/ACP/AATS/PCNA/SCAI/STS Guideline for the Diagnosis and Management of Patients With Stable Ischemic Heart Disease, 2013 ACCF/AHA Guideline for the Management of ST-Elevation Myocardial Infarction, 2014 AHA/ACC Guideline for the Management of Patients With Non-ST-Elevation Acute Coronary Syndromes, and 2014 ACC/AHA Guideline on Perioperative Cardiovascular Evaluation and Management of Patients Undergoing Noncardiac Surgery. *Circulation*. 2016;134:e123-e155. doi: 10.1161/CIR.0000000000000404.
  16. Valgimigli M, Bueno H, Byrne RA, Collet J-P, Costa F, Jeppsson A, Jüni P, Kastrati A, Kolh P, Mauri L, et al. 2017 ESC focused update on dual antiplatelet therapy in coronary artery disease developed in collaboration with EACTS: The Task Force for dual antiplatelet therapy in coronary artery disease of the European Society of Cardiology (ESC) and of the European Association for Cardio-Thoracic Surgery (EACTS). *European Heart Journal*. 2018;39:213-260. doi: 10.1093/eurheartj/ehx419.
  17. Lawton JS, Tamis-Holland JE, Bangalore S, Bates ER, Beckie TM, Bischoff JM, Bittl JA, Cohen MG, DiMaio JM, Don CW, et al. 2021 ACC/AHA/SCAI Guideline for Coronary Artery Revascularization: A Report of the American College of Cardiology/American Heart Association Joint Committee on Clinical Practice Guidelines. *Circulation*. 2022;145:e18-e114. doi: 10.1161/CIR.0000000000001038.
  18. Neumann FJ, Sousa-Uva M, Ahlsson A, Alfonso F, Banning AP, Benedetto U, Byrne RA, Collet JP, Falk V, Head SJ, et al. 2018 ESC/EACTS Guidelines on myocardial revascularization. *Eur Heart J*. 2019;40:87-165. doi: 10.1093/eurheartj/ehy394.
